# Supplementary material for: Population-Level Evidence of the Gender Gap in Technology Entrepreneurship
Source: Atypon-hosted journal article supplement (doi:10.1287/stsc.2022.0170), 2022-09-12
Supplement: stsc.2022.0170.sm1.pdf [file stsc.2022.0170.sm1.pdf]

**ASSIGNMENT OF COPYRIGHT**

This form is to be signed by the author(s) or, if the copyright is owned by the author(s)' employer, by the employer or an authorized representative of the employer.

**Author: Please read the INFORMS copyright and plagiarism policies at <http://pubsonline.informs.org/authorportal>, and check the box below.**

**As copyright owner, I confirm that I have read the INFORMS copyright and plagiarism policies at <http://pubsonline.informs.org/authorportal>.**

In consideration of publication in *Strategy Science* of the paper currently titled

by

all right, title, and interest in and to the copyright in this paper, which is owned by

are hereby transferred to INFORMS (for U.S. Government employees, to the extent transferable) for publication in *Strategy Science* and in other publications of, arranged by, or licensed by INFORMS. By granting this assignment of copyright to INFORMS, the owner(s) agree and allow redistribution of this paper by INFORMS in paper-based and electronic formats, as well as digital document-delivery services and databases.

INFORMS acknowledges that, notwithstanding any other terms or conditions in this agreement, this copyright assignment is made subject to the limitation that the owner reserves the following rights:

- (a) To freely post the author accepted manuscript (AAM) version of this paper on personal websites, scholarly collaboration networks, or noncommercial institutional repositories immediately after acceptance. Posted AAMs must include the DOI (permalink) provided by INFORMS to the final published version of record. The owner may not post the final published version of record except where authorized under an **INFORMS Open Option** open access publication license.
- (b) To use all or part of this paper in future works he or she may write or edit (for example, textbooks, reviews, lectures), and obtain a copyright assignment from INFORMS without fee for such purposes.
- (c) Patent rights, trademark rights, or rights to any process, product, or procedure described in this paper.

The owner hereby certifies that this paper has not been published elsewhere and that no part of the material is subject to another copyright except those parts covered by permissions the owner has obtained. Copies of these permissions are enclosed.

**Note: Only one author's signature is required. Coauthors implicitly delegate authority to the signatory author.**

**Owner's Signature (signing on behalf of all authors):**

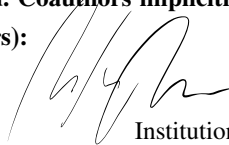

Print Name:

Institution:

Title:

Date:

**FOR U.S. GOVERNMENT EMPLOYEES ONLY**

**THIS WORK IS PUBLIC DOMAIN—I certify that the above-named article is a work of authorship prepared as part of the undersigned author's official duties as an officer or employee of the U.S. government and is therefore in the public domain. (Please note that working on a U.S.-government funded research grant or as a civilian employee at a U.S. Government agency does not typically qualify authors for placing their article in the public domain. Authors should consult their employer for guidance on whether the above-named article should be considered in the public domain.)**

**THIS WORK IS NOT PUBLIC DOMAIN**

This signed statement must be received by the editor's office before the manuscript can be accepted for publication. Address requests for further information or exception to INFORMS at the address below.
